# Supplementary material for: A Genome-Wide, Fine-Scale Map of Natural Pigmentation Variation in Drosophila melanogaster
Source: PubMed Central journal article supplement (PMC3674992; doi:10.1371/journal.pgen.1003534), 2013-06-06
Supplement: pgen.1003534.s013.pdf [file pgen.1003534.s013.pdf]

Supplementary Table 1. SNPs ranked by their p-values in combined analysis of the Viennese and Bolzano populations.

| Rank | Chromosome | Position | Reference | Change | Gene ID     | Gene name      | Effect                            | Old AA/new AA      | Old codon/new codon | P-value     |
|------|------------|----------|-----------|--------|-------------|----------------|-----------------------------------|--------------------|---------------------|-------------|
| 1    | X          | 9121129  | C         | T      | FBgn0030108 | Gr8a           | UPSTREAM                          | 41 bases           | na                  | 1.38804E-58 |
| 2    | X          | 9121094  | T         | C      | FBgn0030108 | Gr8a           | UPSTREAM                          | 76 bases           | na                  | 2.06137E-56 |
| 3    | X          | 9120922  | G         | A      | na          | na             | INTERGENIC                        | na                 | na                  | 6.83878E-51 |
| 4    | X          | 9121177  | C         | T      | FBgn0030108 | Gr8a           | UTR 5 PRIME                       | na                 | na                  | 1.20335E-34 |
| 5    | X          | 9121338  | A         | G      | FBgn0030108 | Gr8a           | NON SYNONYMOUS CODING             | na                 | H/R                 | 3.6258E-34  |
| 6    | X          | 9121191  | C         | T      | FBgn0030108 | Gr8a           | UTR 5 PRIME                       | na                 | na                  | 9.81618E-34 |
| 7    | X          | 9119071  | T         | G      | na          | na             | INTERGENIC                        | na                 | na                  | 5.41522E-29 |
| 8    | X          | 9120204  | A         | C      | FBgn0030107 | CG15370        | NON SYNONYMOUS CODING             | na                 | H/P                 | 1.09994E-23 |
| 9    | X          | 9119160  | T         | A      | na          | na             | INTERGENIC                        | na                 | na                  | 4.45855E-23 |
| 10   | X          | 9119116  | G         | A      | na          | na             | INTERGENIC                        | na                 | na                  | 4.9696E-23  |
| 11   | X          | 9121584  | G         | C      | FBgn0030108 | Gr8a           | NON SYNONYMOUS CODING             | na                 | G/A                 | 5.18733E-23 |
| 12   | X          | 9119157  | T         | C      | na          | na             | INTERGENIC                        | na                 | na                  | 5.55757E-23 |
| 13   | 3L         | 1085454  | T         | C      | FBgn0004870 | bab1           | INTRON                            | na                 | na                  | 7.62941E-23 |
| 14   | X          | 9118408  | T         | C      | na          | na             | INTERGENIC                        | na                 | na                  | 9.93985E-22 |
| 15   | X          | 9120730  | G         | C      | FBgn0030107 | CG15370        | DOWNSTREAM                        | 129 bases          | na                  | 1.96712E-21 |
| 16   | X          | 9117751  | C         | T      | na          | na             | INTERGENIC                        | na                 | na                  | 2.1077E-21  |
| 17   | X          | 9120683  | A         | C      | FBgn0030107 | CG15370        | DOWNSTREAM                        | 82 bases           | na                  | 2.78451E-21 |
| 18   | 3L         | 1074985  | G         | C      | FBgn0004870 | bab1           | INTRON                            | na                 | na                  | 5.52768E-20 |
| 19   | X          | 9123903  | A         | T      | FBgn0030109 | CG12121        | INTRON                            | na                 | na                  | 2.80031E-19 |
| 20   | X          | 9117728  | A         | T      | na          | na             | INTERGENIC                        | na                 | na                  | 3.38262E-19 |
| 21   | X          | 9116599  | C         | T      | FBgn0086367 | t              | INTRON                            | na                 | na                  | 3.95465E-19 |
| 22   | 3L         | 1074986  | T         | G      | FBgn0004870 | bab1           | INTRON                            | na                 | na                  | 1.79784E-18 |
| 23   | X          | 9123893  | G         | A      | FBgn0030109 | CG12121        | INTRON                            | na                 | na                  | 3.09999E-16 |
| 24   | X          | 9120247  | G         | C      | FBgn0030107 | CG15370        | SYNONYMOUS CODING                 | na                 | R/R                 | 4.26437E-16 |
| 25   | X          | 9123892  | A         | C      | FBgn0030109 | CG12121        | INTRON                            | na                 | na                  | 4.77851E-16 |
| 26   | 3L         | 1102745  | G         | T      | na          | na             | INTERGENIC                        | na                 | na                  | 6.33641E-16 |
| 27   | 3L         | 1102996  | C         | T      | na          | na             | INTERGENIC                        | na                 | na                  | 1.41572E-15 |
| 28   | 3R         | 17064232 | C         | A      | na          | na             | INTERGENIC                        | na                 | na                  | 1.53166E-15 |
| 29   | X          | 9127299  | G         | A      | FBgn0052704 | Ir8a           | SYNONYMOUS CODING                 | na                 | G/G                 | 2.1325E-15  |
| 30   | X          | 9127794  | C         | G      | FBgn0052704 | Ir8a           | SYNONYMOUS CODING                 | na                 | V/V                 | 2.33085E-15 |
| 31   | X          | 9125001  | G         | T      | FBgn0030109 | CG12121        | NON SYNONYMOUS CODING             | na                 | A/D                 | 1.20985E-14 |
| 32   | X          | 9117680  | G         | A      | na          | na             | INTERGENIC                        | na                 | na                  | 2.50336E-14 |
| 33   | 3L         | 1102726  | A         | G      | na          | na             | INTERGENIC                        | na                 | na                  | 3.72131E-14 |
| 34   | X          | 9121477  | G         | A      | FBgn0030108 | Gr8a           | SYNONYMOUS CODING                 | na                 | L/L                 | 5.39319E-14 |
| 35   | X          | 9113143  | A         | G      | FBgn0086367 | t              | SYNONYMOUS CODING                 | na                 | S/S                 | 5.4196E-14  |
| 36   | X          | 9122048  | A         | C      | FBgn0030108 | Gr8a           | NON SYNONYMOUS CODING             | na                 | K/Q                 | 8.96889E-14 |
| 37   | 3L         | 1103020  | G         | T      | na          | na             | INTERGENIC                        | na                 | na                  | 9.25067E-14 |
| 38   | 3L         | 1102833  | T         | C      | na          | na             | INTERGENIC                        | na                 | na                  | 1.37517E-13 |
| 39   | 3L         | 1103414  | T         | C      | na          | na             | INTERGENIC                        | na                 | na                  | 1.94274E-13 |
| 40   | X          | 9117334  | A         | C      | FBgn0086367 | t              | UPSTREAM                          | 44 bases           | na                  | 2.97377E-13 |
| 41   | 3L         | 1074701  | G         | A      | FBgn0004870 | bab1           | INTRON                            | na                 | na                  | 5.8389E-13  |
| 42   | X          | 9119334  | T         | A      | FBgn0030107 | CG15370        | UPSTREAM                          | 155 bases          | na                  | 6.5942E-13  |
| 43   | X          | 9127962  | G         | A      | FBgn0052704 | Ir8a           | SYNONYMOUS CODING                 | na                 | I/I                 | 1.23671E-12 |
| 44   | X          | 9119872  | G         | T      | FBgn0030107 | CG15370        | SYNONYMOUS CODING                 | na                 | P/P                 | 1.27094E-12 |
| 45   | 3L         | 1260112  | G         | A      | FBgn0035199 | CG9134         | INTRON                            | na                 | na                  | 1.2789E-12  |
| 46   | 3L         | 1090584  | C         | A      | FBgn0004870 | bab1           | INTRON                            | na                 | na                  | 1.4283E-12  |
| 47   | X          | 9127383  | C         | T      | FBgn0052704 | Ir8a           | SYNONYMOUS CODING                 | na                 | K/K                 | 1.79946E-12 |
| 48   | 3L         | 21912511 | A         | C      | FBgn0262737 | mub            | INTRON                            | na                 | na                  | 1.80077E-12 |
| 49   | X          | 9167319  | T         | C      | FBgn0030122 | CG16892        | UPSTREAM                          | 131 bases          | na                  | 1.83919E-12 |
| 50   | X          | 9117516  | T         | G      | na          | na             | INTERGENIC                        | na                 | na                  | 1.98843E-12 |
| 51   | 3L         | 1085687  | G         | A      | FBgn0004870 | bab1           | INTRON                            | na                 | na                  | 2.46326E-12 |
| 52   | 3L         | 1102064  | A         | G      | na          | na             | INTERGENIC                        | na                 | na                  | 2.94692E-12 |
| 53   | 3L         | 1103402  | A         | T      | na          | na             | INTERGENIC                        | na                 | na                  | 3.18829E-12 |
| 54   | 3L         | 1102065  | T         | G      | na          | na             | INTERGENIC                        | na                 | na                  | 3.37687E-12 |
| 55   | X          | 9242507  | G         | T      | FBgn0085478 | CG34449        | INTRON                            | na                 | na                  | 3.58302E-12 |
| 56   | 3R         | 17064002 | A         | G      | na          | na             | INTERGENIC                        | na                 | na                  | 3.67442E-12 |
| 57   | X          | 9127926  | C         | T      | FBgn0052704 | Ir8a           | SYNONYMOUS CODING                 | na                 | R/R                 | 4.01758E-12 |
| 58   | X          | 9113092  | G         | A      | FBgn0086367 | t              | SYNONYMOUS CODING                 | na                 | L/L                 | 5.29601E-12 |
| 59   | X          | 9113122  | G         | A      | FBgn0086367 | t              | SYNONYMOUS CODING                 | na                 | Y/Y                 | 5.3943E-12  |
| 60   | X          | 9119866  | T         | A      | FBgn0030107 | CG15370        | SYNONYMOUS CODING                 | na                 | A/A                 | 5.65005E-12 |
| 61   | X          | 9118951  | C         | G      | na          | na             | INTERGENIC                        | na                 | na                  | 8.85986E-12 |
| 62   | X          | 9225280  | C         | T      | FBgn0085478 | CG34449        | DOWNSTREAM / INTRON / UTR 3 PRIME | 92 bases / na / na | na                  | 9.71941E-12 |
| 63   | 3L         | 1086181  | G         | A      | FBgn0004870 | bab1           | INTRON                            | na                 | na                  | 1.11435E-11 |
| 64   | X          | 9166681  | T         | A      | FBgn0030121 | CG17446        | INTRON                            | na                 | na                  | 1.12959E-11 |
| 65   | X          | 9119265  | G         | A      | na          | na             | INTERGENIC                        | na                 | na                  | 1.34807E-11 |
| 66   | X          | 9118969  | A         | G      | na          | na             | INTERGENIC                        | na                 | na                  | 1.62516E-11 |
| 67   | 3L         | 1074818  | C         | T      | FBgn0004870 | bab1           | INTRON                            | na                 | na                  | 1.87887E-11 |
| 68   | X          | 9125894  | T         | C      | FBgn0030109 | CG12121        | SYNONYMOUS CODING                 | na                 | K/K                 | 2.08285E-11 |
| 69   | X          | 9099953  | A         | G      | FBgn0030102 | CG12119        | DOWNSTREAM                        | 200 bases          | na                  | 2.20228E-11 |
| 70   | X          | 9119833  | C         | T      | FBgn0030107 | CG15370        | SYNONYMOUS CODING                 | na                 | D/D                 | 2.78556E-11 |
| 71   | 3L         | 1084059  | T         | C      | FBgn0004870 | bab1           | INTRON                            | na                 | na                  | 3.12982E-11 |
| 72   | 3L         | 672619   | T         | C      | na          | na             | INTERGENIC                        | na                 | na                  | 3.52791E-11 |
| 73   | X          | 9113083  | A         | G      | FBgn0086367 | t              | SYNONYMOUS CODING                 | na                 | A/A                 | 3.95643E-11 |
| 74   | 3L         | 1102200  | T         | A      | na          | na             | INTERGENIC                        | na                 | na                  | 4.15024E-11 |
| 75   | 3L         | 993824   | G         | T      | FBgn0035179 | CG12038        | UPSTREAM                          | 164 bases          | na                  | 4.15224E-11 |
| 76   | X          | 8832027  | A         | G      | FBgn0261549 | rdgA           | INTRON                            | na                 | na                  | 4.35254E-11 |
| 77   | X          | 9121801  | T         | C      | FBgn0030108 | Gr8a           | SYNONYMOUS CODING                 | na                 | H/H                 | 5.61235E-11 |
| 78   | X          | 9132456  | C         | T      | FBgn0260789 | mxc            | SYNONYMOUS CODING                 | na                 | A/A                 | 5.63008E-11 |
| 79   | X          | 9125150  | T         | C      | FBgn0030109 | CG12121        | SYNONYMOUS CODING                 | na                 | E/E                 | 6.25503E-11 |
| 80   | X          | 9113622  | A         | G      | FBgn0086367 | t              | INTRON                            | na                 | na                  | 6.41577E-11 |
| 81   | 3R         | 12742092 | G         | A      | FBgn0262906 | msa            | INTRON                            | na                 | na                  | 7.41026E-11 |
| 82   | X          | 9168413  | A         | C      | FBgn0030122 | CG16892        | SYNONYMOUS CODING                 | na                 | S/S                 | 7.66433E-11 |
| 83   | X          | 8882814  | T         | G      | FBgn0030073 | CG10962 / rdgA | INTRON                            | na                 | na                  | 8.05017E-11 |
| 84   | 3L         | 1103291  | T         | A      | na          | na             | INTERGENIC                        | na                 | na                  | 8.66115E-11 |
| 85   | X          | 9116537  | A         | G      | FBgn0086367 | t              | INTRON                            | na                 | na                  | 9.5972E-11  |
| 86   | X          | 9167423  | A         | T      | FBgn0030122 | CG16892        | UPSTREAM                          | 27 bases           | na                  | 1.02723E-10 |
| 87   | X          | 9113116  | A         | C      | FBgn0086367 | t              | SYNONYMOUS CODING                 | na                 | V/V                 | 1.03401E-10 |
| 88   | 3L         | 7183480  | C         | T      | na          | na             | INTERGENIC                        | na                 | na                  | 1.03464E-10 |
| 89   | 3L         | 1103300  | T         | G      | na          | na             | INTERGENIC                        | na                 | na                  | 1.14197E-10 |
| 90   | X          | 9686968  | T         | A      | FBgn0052698 | CG32698        | INTRON                            | na                 | na                  | 1.25269E-10 |
| 91   | X          | 9200486  | C         | T      | na          | na             | INTERGENIC                        | na                 | na                  | 1.25917E-10 |
| 92   | 2R         | 4383278  | C         | T      | FBgn0050361 | mtt            | INTRON                            | na                 | na                  | 1.3051E-10  |
| 93   | 3L         | 1972518  | C         | A      | FBgn0035300 | CG1139         | SYNONYMOUS CODING                 | na                 | P/P                 | 1.33466E-10 |
| 94   | 3L         | 4916850  | A         | T      | FBgn0028699 | Rh50           | INTRON                            | na                 | na                  | 1.34815E-10 |
| 95   | 3L         | 1104190  | C         | T      | na          | na             | INTERGENIC                        | na                 | na                  | 1.37099E-10 |
| 96   | X          | 9125615  | G         | A      | FBgn0030109 | CG12121        | INTRON                            | na                 | na                  | 1.38642E-10 |
| 97   | X          | 9965042  | C         | T      | FBgn0030174 | CG15312        | UPSTREAM                          | 143 bases          | na                  | 1.50068E-10 |
| 98   | X          | 9125023  | C         | G      | FBgn0030109 | CG12121        | NON SYNONYMOUS CODING             | na                 | E/Q                 | 1.53996E-10 |
| 99   | X          | 9200484  | A         | C      | na          | na             | INTERGENIC                        | na                 | na                  | 1.63982E-10 |
| 100  | 3L         | 1102221  | T         | G      | na          | na             | INTERGENIC                        | na                 | na                  | 1.66088E-10 |
