# Supplementary material for: A Genome-Wide, Fine-Scale Map of Natural Pigmentation Variation in Drosophila melanogaster
Source: PubMed Central journal article supplement (PMC3674992; doi:10.1371/journal.pgen.1003534), 2013-06-06
Supplement: pgen.1003534.s017.pdf [file pgen.1003534.s017.pdf]

| Gene  | Chrom | Estimated position | Transposable element family | Flybase ID  | Population | Total light coverage | Total dark coverage | Presence frequency light | Presence frequency dark | Frequency difference | CMH p-value |
|-------|-------|--------------------|-----------------------------|-------------|------------|----------------------|---------------------|--------------------------|-------------------------|----------------------|-------------|
| bab   | 3L    | 1090285.75         | FR                          | mdg1        | both       | 498                  | 305                 | 0.01                     | 0.03                    | 0.018                | 3.7E-04     |
| bab   | 3L    | 1083542.5          | FR                          | opus        | Bolzano    | 142                  | 125                 | 0.00                     | 0.04                    | 0.040                | 0.022 *     |
| bab   | 3L    | 1098821            | FR                          | p-element   | Bolzano    | 264                  | 264                 | 0.00                     | 0.03                    | 0.027                | 0.026       |
| bab   | 3L    | 1087483            | FR                          | I-element   | Bolzano    | 255                  | 254                 | 0.00                     | 0.02                    | 0.024                | 0.040       |
| bab   | 3L    | 1086188            | FR                          | roo         | Bolzano    | 68.5                 | 79.5                | 0.02                     | 0.07                    | 0.047                | 0.358 *     |
| bab   | 3L    | 1083087            | R                           | roo         | Bolzano    | 131                  | 148                 | 0.00                     | 0.01                    | 0.007                | 0.398       |
| bab   | 3L    | 1080939            | FR                          | 412         | Vienna     | 179                  | 56                  | 0.02                     | 0.05                    | 0.037                | 0.406       |
| bab   | 3L    | 1083501            | R                           | F-element   | Bolzano    | 83                   | 53                  | 0.02                     | 0.06                    | 0.033                | 0.480 *     |
| bab   | 3L    | 1086290.5          | FR                          | Tabor       | Bolzano    | 68                   | 86                  | 0.00                     | 0.02                    | 0.023                | 0.598 *     |
| bab   | 3L    | 1098887.75         | RFR                         | jockey      | Vienna     | 90                   | 255                 | 0.02                     | 0.03                    | 0.009                | 0.797       |
| bab   | 3L    | 1069502.5          | FR                          | 412         | Bolzano    | 240                  | 233                 | 0.02                     | 0.02                    | 0.001                | 0.861       |
| bab   | 3L    | 1078942            | R                           | Doc         | Bolzano    | 86                   | 94                  | 0.02                     | 0.01                    | 0.013                | 0.876       |
| bab   | 3L    | 1086505            | F                           | Cr1a        | Bolzano    | 111                  | 116                 | 0.00                     | 0.01                    | 0.009                | 0.946       |
| bab   | 3L    | 1076828            | F                           | Ivk         | Bolzano    | 130                  | 140                 | 0.02                     | 0.01                    | 0.008                | 0.971       |
| bab   | 3L    | 1102390            | F                           | p-element   | Bolzano    | 107                  | 114                 | 0.01                     | 0.02                    | 0.008                | 0.977       |
| ebony | 3R    | 17080912.8         | FRFRFR                      | INE-1       | both       | 460                  | 444                 | 0.19                     | 0.84                    | 0.655                | 2.2E-13 *   |
| ebony | 3R    | 17082141.8         | FRF                         | Burdock     | both       | 273                  | 275                 | 0.03                     | 0.00                    | 0.033                | 0.009 *     |
| ebony | 3R    | 17082059           | R                           | roo         | Bolzano    | 148                  | 159                 | 0.03                     | 0.00                    | 0.034                | 0.050 *     |
| ebony | 3R    | 17082115.5         | FR                          | Doc         | Bolzano    | 177                  | 216                 | 0.01                     | 0.04                    | 0.031                | 0.083 *     |
| ebony | 3R    | 17059246           | FR                          | I-element   | Bolzano    | 199                  | 286                 | 0.00                     | 0.02                    | 0.021                | 0.133       |
| ebony | 3R    | 17082065           | F                           | hobo        | Bolzano    | 19                   | 17                  | 0.16                     | 0.00                    | 0.158                | 0.219 *     |
| ebony | 3R    | 17049287           | F                           | S-element   | Bolzano    | 130                  | 132                 | 0.02                     | 0.00                    | 0.023                | 0.230       |
| ebony | 3R    | 17076452           | R                           | roo         | Bolzano    | 69                   | 67                  | 0.04                     | 0.00                    | 0.043                | 0.356       |
| ebony | 3R    | 17064359           | FR                          | Max-element | Bolzano    | 254                  | 270                 | 0.02                     | 0.01                    | 0.013                | 0.484       |
| ebony | 3R    | 17082055           | R                           | hopper      | Bolzano    | 117                  | 140                 | 0.03                     | 0.01                    | 0.020                | 0.487 *     |
| ebony | 3R    | 17074652           | F                           | roo         | Bolzano    | 23                   | 26                  | 0.13                     | 0.04                    | 0.092                | 0.701       |
| ebony | 3R    | 17082321.3         | FRF                         | jockey      | Vienna     | 158                  | 117                 | 0.03                     | 0.03                    | 0.000                | 0.967       |
| ebony | 3R    | 17064810.3         | RRR                         | mdg1        | both       | 214                  | 251                 | 0.02                     | 0.02                    | 0.003                | 1.000       |
| tan   | X     | 9113715            | R                           | roo         | Bolzano    | 57                   | 89                  | 0.11                     | 0.00                    | 0.105                | 0.007       |
| tan   | X     | 9112000            | R                           | F-element   | Bolzano    | 115                  | 124                 | 0.04                     | 0.00                    | 0.043                | 0.189       |
| tan   | X     | 9106434            | FR                          | flea        | Bolzano    | 173                  | 168                 | 0.01                     | 0.03                    | 0.024                | 0.194 *     |
| tan   | X     | 9108802            | FR                          | I-element   | Vienna     | 118                  | 52                  | 0.02                     | 0.06                    | 0.041                | 0.333       |
| tan   | X     | 9106374            | F                           | Transpac    | Bolzano    | 8                    | 6                   | 0.38                     | 0.00                    | 0.375                | 0.386 *     |
| tan   | X     | 9107652.5          | RF                          | jockey      | Bolzano    | 138                  | 132.5               | 0.02                     | 0.00                    | 0.018                | 0.480 *     |
| tan   | X     | 9107662.5          | FR                          | roo         | Bolzano    | 161                  | 185                 | 0.02                     | 0.03                    | 0.014                | 0.543 *     |
| tan   | X     | 9111965            | RF                          | opus        | Bolzano    | 114.5                | 110                 | 0.02                     | 0.01                    | 0.008                | 0.597 *     |
| tan   | X     | 9111730            | R                           | Idefix      | Bolzano    | 17                   | 19                  | 0.12                     | 0.16                    | 0.040                | 0.770 *     |
| tan   | X     | 9111867.25         | RFR                         | 297         | both       | 58                   | 76.5                | 0.02                     | 0.07                    | 0.055                | 0.976 *     |
| tan   | X     | 9107632            | FR                          | hobo        | Bolzano    | 163                  | 210                 | 0.02                     | 0.02                    | 0.005                | 0.990 *     |

Supplementary Table S5. Transposable element insertion frequencies in the pigmentation genes tan, bab and ebony. These regions are defined, as before, as 20kb up- and down- stream of the center of the coding sequence of each gene. Transposable element insertions found in these regions using the method described in the text are shown, except that insertions detected in only one replicate are not shown. A CMH test was performed on the presence and absence counts for each detected insertion. Some frequency estimates may be unreliable, as they come from insertions that overlap with other insertions or, in one case, from an INE-1 insertion, which are typically very short; these are nevertheless shown for completeness.
